# Supplementary material
Source: PubMed Central journal article supplement (PMC8760136)
Supplement: NIHMS1725151-supplement-Supp1.pdf [file NIHMS1725151-supplement-Supp1.pdf]

**Appendix Table 1: Relative rates (RR) of lung cancer incidence by categories of cumulative radon exposure (5-year lag) among male uranium miners in the Příbram region of the Czech Republic, 1977-1996**

| WLM Categories | Total lung cancer cases (n) | Relative Rate (RR) | 95% CI |      |
|----------------|-----------------------------|--------------------|--------|------|
| 0 - <10        | 112                         | 1 (ref)            |        |      |
| 10 - <50       | 227                         | 1.58               | 1.20   | 2.06 |
| 50 - <100      | 139                         | 1.50               | 1.11   | 2.02 |
| 100 - <150     | 117                         | 1.71               | 1.25   | 2.36 |
| 150 - <200     | 93                          | 3.30               | 2.29   | 4.74 |
| 200+           | 164                         | 3.25               | 2.37   | 4.45 |

\*All models are controlled for age and birth cohort WLM = Working Level Months

**Appendix Table 2: Relative rates (RR) of extrathoracic cancer incidence by categories of cumulative radon exposure (5-year lag) among male uranium miners in the Příbram region of the Czech Republic, 1977-1996**

| WLM Categories | Total extrathoracic cancer cases (n) | Relative Rate (RR) | 95% CI |      |
|----------------|--------------------------------------|--------------------|--------|------|
| 0 - <3         | 15                                   | 1 (ref)            |        |      |
| 3 - <5         | 10                                   | 3.85               | 1.58   | 9.39 |
| 5 - <10        | 21                                   | 2.42               | 1.19   | 4.93 |
| 10 - <50       | 32                                   | 1.26               | 0.66   | 2.41 |
| 50 - <100      | 15                                   | 1.05               | 0.5    | 2.24 |
| 100+           | 26                                   | 1.3                | 0.64   | 2.65 |

\*All models are controlled for age and birth cohort WLM = Working Level Months
